# Supplementary material
Source: MDPI journal article supplement (https://www.mdpi.com/2073-4344/13/3/471)
Supplement: s1 [file s1 › catalysts-2201142-supplementary.pdf]

# Supporting Information

The conversion rate of benzyl alcohol and the selectivity of benzaldehyde were calculated with the following equations:

$$\text{Conversion \%} = [(C_0 - C_a)/C_0] \times 100\% \quad (\text{S1})$$

$$\text{Selectivity \%} = [C_b/(C_0 - C_a)] \times 100\% \quad (\text{S2})$$

$C_0$ : initial concentration of benzyl alcohol;  $C_a$  and  $C_b$ : Concentration of benzyl alcohol and benzaldehyde after photocatalytic reaction

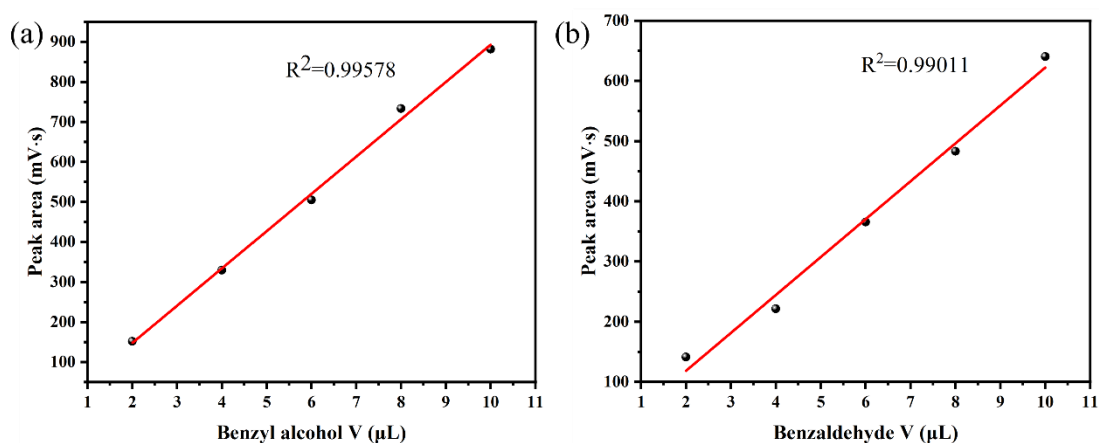

Figure S1. Standard curves for (a) benzyl alcohol and (b) benzaldehyde .

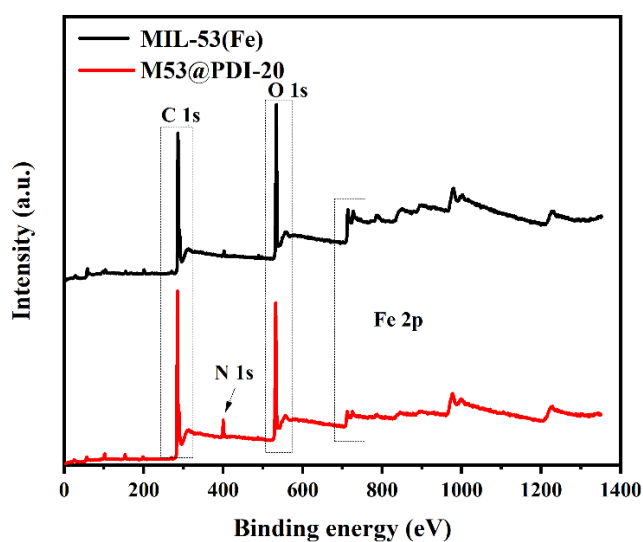

Figure S2. Full spectra of MIL-53(Fe) and M53@PDI-20 samples.

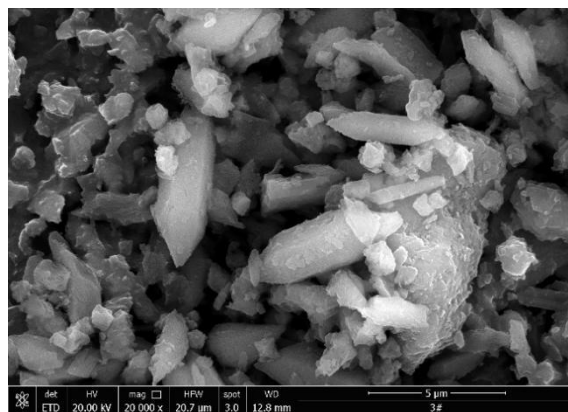

Figure S3. SEM image of M53@PDI-20.

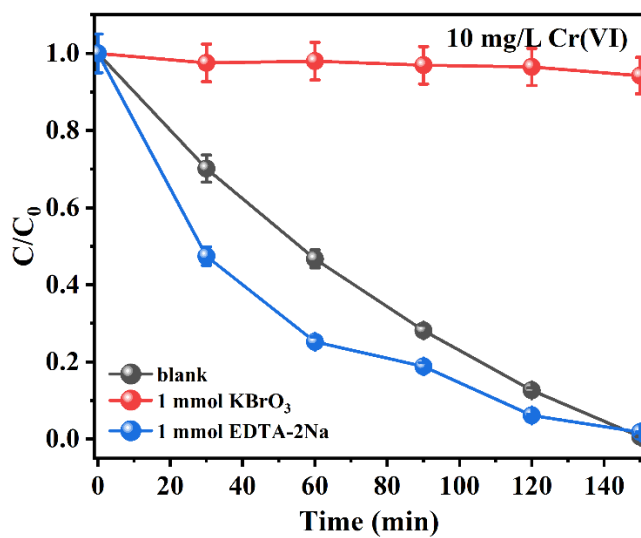

Figure S4. Active species capture experiments for the reduction of 10 mg/L Cr (VI) on M53@PDI-20.

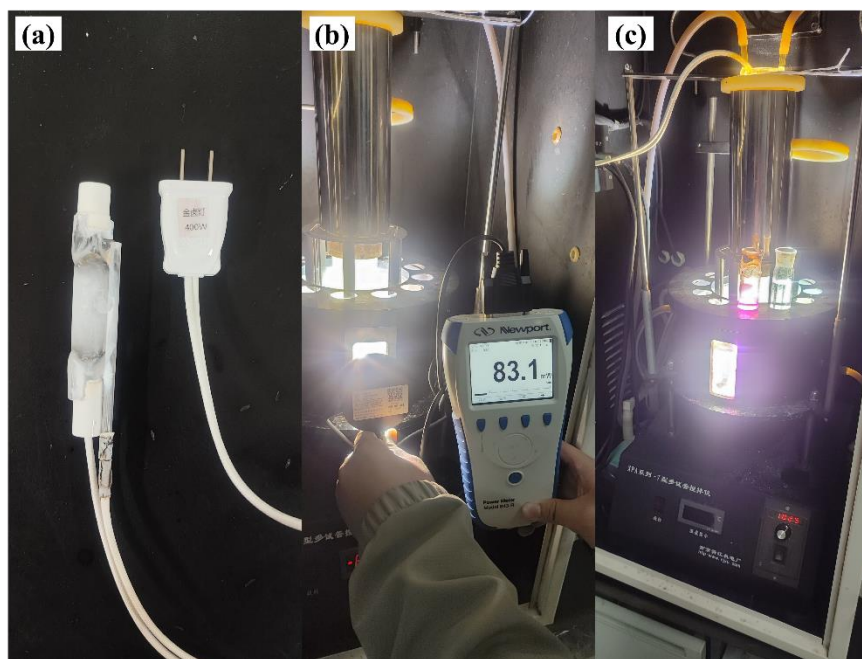

Figure S5. (a) Metal Halide Lamp (400 W), (b) The measured optical power of metal halide lamp (400 W) and (c) Photocatalytic reaction device.

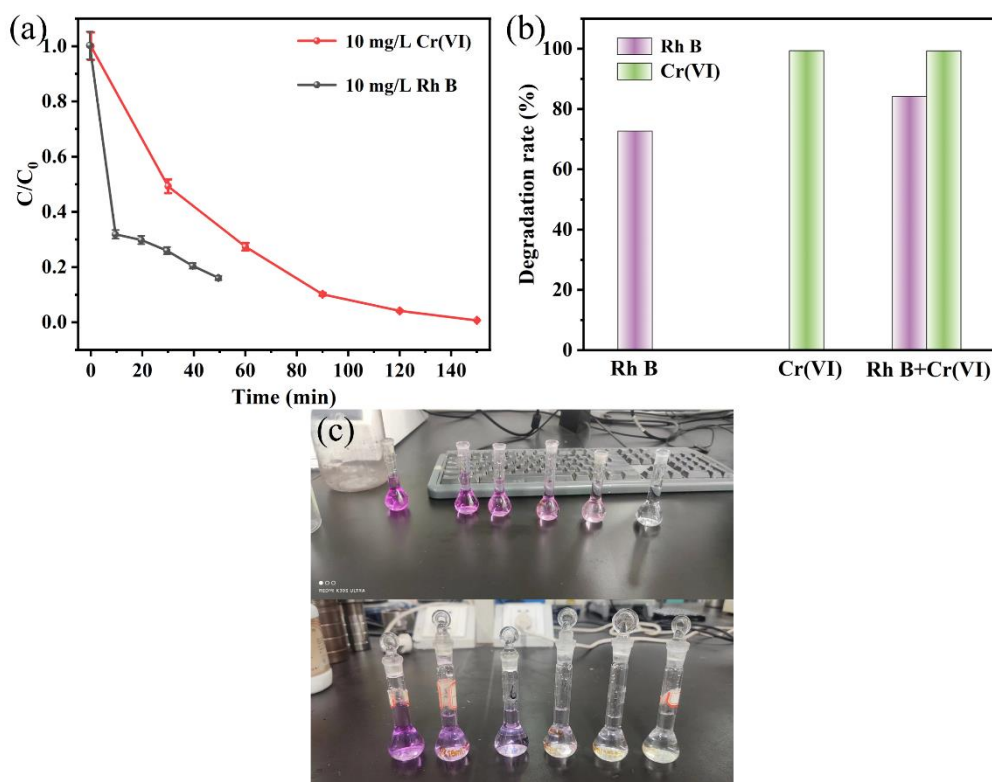

**Figure S6.** (a) Synergistic degradation diagram of M53@PDI-20 samples, (b) Degradation rates of single and mixed degradates and (c) Colour development reactions of singly and synergistically degraded Cr (VI).

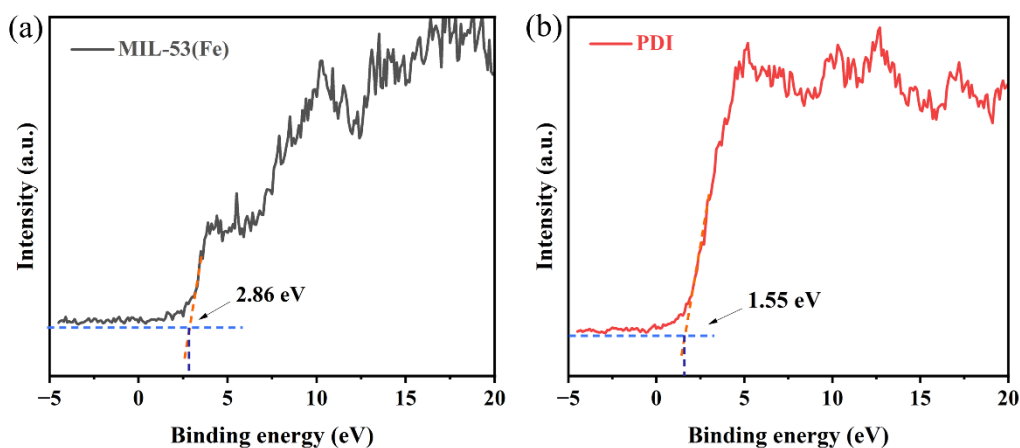

**Figure S7.** VB-XPS spectra of (a) MIL-53(Fe) and (b) PDI.

**Table S1.** Band energy levels of MIL-53(Fe) and PDI.

| Samples    | $E_g$ (eV) | $E_{CB}$ (vs NHE, eV, pH=7) | $E_{VB}$ (vs NHE, eV, pH=7) |
|------------|------------|-----------------------------|-----------------------------|
| PDI        | 1.70       | -0.39                       | 1.31                        |
| MIL-53(Fe) | 2.72       | -0.1                        | 2.62                        |
